# Supplementary material for: Utilising one minute and four minute recovery when employing the resistance training contrast method does not negatively affect subsequent jump performance in the presence of concurrent training
Source: PeerJ. 2020 Oct 13;8:e10031. doi: 10.7717/peerj.10031 (PMC7566756; doi:10.7717/peerj.10031)
Supplement: Supplemental Information 1 [file peerj-08-10031-s001.xlsx]

## Sheet: Preceding skills load
Participant	1 min TD	4 min TD	1 min HSR	4 min HSR	1 min >75%	4 min >75%	1 min >85%	4 min >85%	1 min m/min	4 min m/min
1	7687.98	8129.24	2632.8	2698.03	10.06	10	0	0	119.06	91.5661
2	6448.05	6122	1930.62	1196.63	195.42	136.04	28.71	15.09	107.093	80.9386
3	6225.78	6447.04	1107.61	1051.43	174.64	105.97	56.78	36.09	90.2699	88.1231
4	7173.98	6718.37	1662.54	1744.99	158.73	282.23	54.31	146.44	93.1351	88.8231
5	9848.37	8738.24	2777.71	3398.08	181.1	393.64	41.52	36.61	81.3473	108.038
6	8185.37	10328.7	3316.92	2563.77	23.24	70.24	0	8.06	124.386	80.4974
7	6870.35	6940.78	1407.07	1989.46	146.76	189.49	18.57	84.99	90.0628	91.7635
8	8722.9	7729.98	2739.27	3050.01	277.14	113.11	87.04	21.05	96.4882	123.48
9	9619.04	8903.69	3301.71	1886.07	118.81	204.76	29.32	67.73	97.3838	85.7659
10	8338.97	7987.08	2499.04	3217.19	93.93	86.67	29.04	13.14	90.4568	121.017

## Sheet: Preceding Squat Tonnage
Participant	1 min set 1	1 min set 2	1 min set 3	4 min set 1	4 min set 2	4 min set 3
1	330	330	330	330	360	360
2	300	360	420	240	300	345
3	300	300	300	300	300	300
4	240	300	300	240	300	300
5	360	360	360	360	360	360
6	330	330	330	330	360	360
7	195	195	210	210	210	225
8	330	360	375	300	330	330
9	300	345	345	300	330	360
10	300	300	300	300	330	330

## Sheet: RSI
Participant	1 min Baseline	1 min Set 1	1 min Set 2	1 min Set 3	4 min Baseline	4 min Set 1	4 min Set 2	4 min Set 3
1	3.22462	2.776	2.97322	2.75099	2.94709	2.97886	3.03105	2.49561
2	1.36689	1.32987	1.77354	1.58153	1.21658	1.63431	1.44203	1.4014
3	1.97975	2.22625	1.97789	2.35829	2.06642	1.95322	2.28981	1.97446
4	2.60564	2.98623	3.10358	3.14359	2.54111	2.43543	2.42026	2.70395
5	1.81085	1.97739		2.3097	2.33901	2.42429	2.40434	1.75139
6	3.42992	4.32569	4.30665	4.17545	4.41138	3.52303		3.25197
7	2.31719	2.68769	2.64269	2.72187	2.89383	2.14868	2.22541	2.13148
8	2.5446	3.04802	2.35224	2.60099	2.49907	2.37207	2.25024	2.21909
9	2.17229	2.27749	2.20942	2.08524	2.22387	2.43304	2.49966	2.26139
10	1.43168	1.76757	1.8008	1.69621	1.65087	1.50404	1.7951	1.5638

## Sheet: Impulse
Participant	1 min Baseline	1 min Set 1	1 min Set 2	1 min Set 3	4 min Baseline	4 min Set 1	4 min Set 2	4 min Set 3
1	24738.4	18255.2	24282.3	18611.2	18754	17929.4	19490.7	14406.8
2	7233.72	6845.9	10166.9	8997.32	6523.69	9199.37	7990.88	7189.48
3	9982.3	12519.3	10454.2	13244.8	10443.7	9853.22	11804.2	11038.9
4	12862.4	16295.6	17330.8	18869.6	14113.2	13095.5	13876.8	14011.1
5	7656.61	8875.19		10364.9	11488.8	13269.4	14263.8	8505.41
6	21099.5	25534.1	29534.7	28380.6	28001.4	22970.3		19136.9
7	10042.9	12021	12110.4	12225.2	13727.6	9842.21	8941.58	9373.96
8	15746.9	17666.3	13106.8	15615.1	14844.3	13072.1	13447.6	12401.1
9	11345	10885.5	11302.6	11439	13865	17216.9	17733.9	15005.6
10	6128.62	6979.16	7422.11	7111.53	5813.39	5697.67	7029.56	6350.8

## Sheet: Relative Impulse
Participant	1 min Baseline	1 min Set 1	1 min Set 2	1 min Set 3	4 min Baseline	4 min Set 1	4 min Set 2	4 min Set 3
1	282.724	208.631	277.512	212.699	212.631	203.281	220.983	163.342
2	70.4354	66.6592	98.996	87.6078	63.5527	89.6188	77.8459	70.0388
3	118.555	148.685	124.159	157.302	124.924	117.862	141.199	132.044
4	161.994	205.234	218.272	237.653	177.972	165.139	174.991	176.685
5	81.8014	94.8204		110.736	123.27	142.375	153.045	91.2598
6	280.953	340.002	393.272	377.904	367.473	301.448		251.141
7	134.985	161.573	162.774	164.317	184.758	132.466	120.344	126.164
8	176.634	198.163	147.02	175.155	168.781	148.631	152.9	141.002
9	128.193	123	127.713	129.254	157.468	195.535	201.407	170.421
10	74.3765	84.6986	90.0741	86.305	71.0684	69.6537	85.9359	77.6381

## Sheet: Flight Time
Participant	1 min Baseline	1 min Set 1	1 min Set 2	1 min Set 3	4 min Baseline	4 min Set 1	4 min Set 2	4 min Set 3
1	0.469	0.446667	0.420667	0.468667	0.515667	0.532667	0.527333	0.489
2	0.472667	0.469333	0.496333	0.469667	0.45	0.475667	0.464	0.464333
3	0.477667	0.467	0.463333	0.489333	0.445	0.469667	0.466667	0.435333
4	0.534667	0.536333	0.545333	0.521	0.491	0.478333	0.480667	0.501333
5	0.563667	0.568333		0.607	0.562667	0.573	0.515667	0.515
6	0.511667	0.536	0.519	0.528	0.579	0.497		0.514
7	0.545667	0.575	0.562333	0.564	0.520667	0.493667	0.530333	0.505
8	0.478333	0.530667	0.504333	0.506	0.489333	0.506667	0.471	0.478
9	0.497333	0.555	0.516333	0.478333	0.44	0.429	0.422	0.419333
10	0.471667	0.533	0.496333	0.511	0.53	0.492667	0.514333	0.483

## Sheet: Contact Time
Participant	1 min Baseline	1 min Set 1	1 min Set 2	1 min Set 3	4 min Baseline	4 min Set 1	4 min Set 2	4 min Set 3
1	0.146	0.165	0.142667	0.170333	0.177667	0.181	0.174333	0.196667
2	0.346667	0.353	0.281	0.299333	0.377	0.29	0.325	0.331333
3	0.242333	0.211	0.234667	0.208333	0.215667	0.241	0.204333	0.221333
4	0.207	0.179667	0.175667	0.166	0.194	0.197	0.199	0.19
5	0.314	0.292		0.263333	0.241333	0.237667	0.216667	0.295667
6	0.149333	0.125667	0.120667	0.128	0.134	0.142		0.158
7	0.237333	0.218333	0.214333	0.207333	0.182667	0.231333	0.238333	0.236667
8	0.189333	0.18	0.217667	0.202	0.196667	0.215667	0.210667	0.216333
9	0.232667	0.244667	0.234333	0.229333	0.202333	0.179333	0.171333	0.185333
10	0.329333	0.309	0.276	0.301667	0.325667	0.330333	0.29	0.31
