# Supplementary material for: Utilising one minute and four minute recovery when employing the resistance training contrast method does not negatively affect subsequent jump performance in the presence of concurrent training
Source: PeerJ. 2020 Oct 13;8:e10031. doi: 10.7717/peerj.10031 (PMC7566756; doi:10.7717/peerj.10031)
Supplement: Supplemental Information 2 [file peerj-08-10031-s002.xlsx]

## Sheet: DJ ICC CV raw data
Particpant	RSI J1 1 min	RSI J2 1 min	RSI J3 1 min		RSI J1 4 min	RSI J2 4 min	RSI J3 4 min		IMP J1 1 min	IMP J2 1 min	IMP J3 1 min		IMP J1 4 min	IMP J2 4 min	IMP J3 4 min		Rel IMP J1 1 min	Rel IMP J2 1 min	Rel IMP J3 1 min		Rel IMP J1 4 min	Rel IMP J2 4 min	Rel IMP J3 4 min		FT J1 1 min	FT J2 1 min	FT J3 1 min		FT J1 4 min	FT J2 4 min	FT J3 4 min		CT J1 1 min	CT J2 1 min	CT J3 1 min		CT J1 4 min	CT J2 4 min	CT J3 4 min
1	3.59124	3.12838	2.95425		2.66842	3.52	2.65285		28401.5	23695.9	22117.6		15532.6	25267.3	15462.2		324.588	270.811	252.773		177.516	288.77	176.711		0.492	0.463	0.452		0.507	0.528	0.512		0.137	0.148	0.153		0.19	0.15	0.193
2	1.4375	1.31783	1.34535		1.38699	1.0911	1.17166		8125	6113.7	7462.46		8993.15	4161.02	6416.89		78.8835	59.3563	72.4511		87.3121	40.3982	62.2999		0.46	0.51	0.448		0.405	0.515	0.43		0.32	0.387	0.333		0.292	0.472	0.367
3	1.76718	2.09052	2.08155		2.04147	1.88636	2.27143		8832.06	10758.6	10356.2		11686.6	11268.2	8376.19		105.144	128.079	123.288		139.127	134.145	99.7166		0.463	0.485	0.485		0.443	0.415	0.477		0.262	0.232	0.233		0.217	0.22	0.21
4	3.03209	2.52358	2.26126		2.74863	2.60417	2.27053		15283.4	12141.5	11162.2		15491.8	14432.3	12415.5		192.244	152.723	140.405		194.865	181.538	156.169		0.567	0.535	0.502		0.503	0.5	0.47		0.187	0.212	0.222		0.183	0.192	0.207
5	2.03309	1.61765	1.78182		2.20648	2.53604	2.27451		9419.12	6426.47	7124.24		11222.7	12427.9	10815.7		100.417	68.5125	75.9514		119.645	132.494	115.306		0.553	0.55	0.588		0.545	0.563	0.58		0.272	0.34	0.33		0.247	0.222	0.255
6	3.31288	3.56081	3.41606		5.43333	3.36774	4.43307		17840.5	21385.1	24073		32916.7	19606.5	29346.5		237.556	284.755	320.546		438.304	261.071	390.765		0.54	0.527	0.468		0.652	0.522	0.563		0.163	0.148	0.137		0.12	0.155	0.127
7	2.57005	2.0428	2.33871		3.37342	2.40097	2.9071		12367.1	8459.14	9302.42		14727.8	11657	14797.8		165.558	113.242	124.53		197.16	156.051	198.097		0.532	0.525	0.58		0.533	0.497	0.532		0.207	0.257	0.248		0.158	0.207	0.183
8	2.1831	2.55882	2.89189		2.34146	2.36453	2.79121		13605.6	15700	17935.1		13580.5	14078.8	16873.6		152.872	176.404	201.518		152.59	158.189	189.591		0.465	0.435	0.535		0.48	0.48	0.508		0.213	0.17	0.185		0.205	0.203	0.182
9	1.78295	2.64532	2.08861		2	1.95556	2.71605		8616.28	14625.6	10793.2		11477.3	11062.2	19055.6		97.3591	165.261	121.958		129.687	124.997	215.317		0.46	0.537	0.495		0.44	0.44	0.44		0.258	0.203	0.237		0.22	0.225	0.162
10	1.31212	1.43963	1.54328		1.91418	1.52738	1.51105		6103.03	6229.1	6053.73		7462.69	5190.2	4787.29		74.2461	75.7798	73.6464		90.7869	63.1411	58.2396		0.433	0.465	0.517		0.513	0.53	0.547		0.33	0.323	0.335		0.268	0.347	0.362
